# Supplementary material for: Identification of High-Impact cis-Regulatory Mutations Using Transcription Factor Specific Random Forest Models
Source: PLoS Comput Biol. 2015 Nov 12;11(11):e1004590. doi: 10.1371/journal.pcbi.1004590 (PMC4642938; doi:10.1371/journal.pcbi.1004590)
Supplement: S5 Table — (XLSX) [file pcbi.1004590.s028.xlsx]

## Sheet: Sheet1
Number of used features for each model
TF name	TF motifs	Co-regulatory TF motifs	DHS tracks	Co-regulatory TF tracks	Histone tracks
YY1	10	10	0	2	0
MYC	10	10	0	5	2
ESR1	10	10	5	5	3
KLF5	10	10	2	5	0
SPI1	10	10	4	5	1
NANOG	10	10	0	5	1
STAT3	10	10	3	5	0
FOXM1	10	10	2	5	1
E2F7	10	10	0	5	0
GABPA	10	10	5	5	2
SIX5	8	10	5	5	1
E2F1	10	10	0	5	2
STAT5A	10	10	5	5	0
STAT1	10	10	5	2	1
HNF4A	10	10	5	5	0
NFKB1	10	10	5	5	3
POU2F2	10	10	5	5	0
BATF	10	10	5	5	0
ATF2	10	10	5	5	1
ESRRA	10	10	5	4	1
FOXM1_2	10	10	0	5	0
IRF1	10	10	5	3	0
MYBL2	10	10	0	4	3
STAT2	10	10	5	2	0
PAX5	10	10	5	5	1
TP53	10	10	5	1	1
TFDP1	10	10	1	5	0
ZEB1	10	10	5	5	4
FOSL1	10	10	5	5	4
THAP1	2	10	5	5	3
TCF12	10	10	5	5	0
TAL1	10	10	5	5	3
E2F1_2	10	10	4	5	4
FOXA1	10	10	5	5	0
JUND	10	10	5	5	4
TAF1	8	10	1	5	3
CEBPB	10	10	5	5	1
ESRRA_2	10	10	5	5	0
E2F4	10	10	5	5	5
MYC_2	10	10	5	5	5
JUNB	10	10	5	5	2
SRF	10	10	5	5	0
GLI3	10	10	5	5	5
NFE2L2	10	10	5	5	2
POU5F1	10	10	2	5	0
